# Supplementary material for: Diet and Mobility in the Corded Ware of Central Europe
Source: PubMed Central journal article supplement (PMC4880197; doi:10.1371/journal.pone.0155083), 2016-05-25
Supplement: pone.0155083.s002.pdf [file pone.0155083.s002.pdf]

S1 Analysis results

| SiteName          | RISE#   | Context           | Labno     | bp uncal | 2Sigma | d13Ccoll | d15Ncoll | d13Cenam | d13Cspacing | Sr86/Sr87 | d18Oenam | Region                 | Sex | Ageclass |
|-------------------|---------|-------------------|-----------|----------|--------|----------|----------|----------|-------------|-----------|----------|------------------------|-----|----------|
| Altdorf           | RISE437 |                   | OxA-32090 | 3993     | 29     | -20.7    | 9.9      | -14.6    |             | 6.1       | 0.7126   | -5.0 Bavaria           | F   | Adult    |
| Altdorf           |         |                   | Erl-7541  | 3941     | 48     |          |          |          |             |           |          | Bavaria                | F   | Adult    |
| Bergrheinfeld     | RISE441 | burial 16         | OxA-31805 | 4043     | 27     | -19.5    | 11.1     | -13.2    |             | 6.3       | 0.7090   | -4.7 Bavaria           | M   | juv      |
| Bergrheinfeld     | RISE442 | burial 17         | OxA-31806 | 4047     | 27     | -20.6    | 10.3     | -13.4    |             | 7.3       | 0.7108   | -4.8 Bavaria           | F   | Adult    |
| Bergrheinfeld     | RISE443 | adult female 1982 | OxA-31807 | 3992     | 28     | -19.5    | 9.7      | -11.0    |             | 8.5       | 0.7103   | -4.8 Bavaria           | F   | Adult    |
| Bergrheinfeld     | RISE444 | burial 19         | OxA-31894 | 4048     | 27     | -19.6    | 9.8      | -12.7    |             | 6.9       | 0.7103   | -4.6 Bavaria           | F   | juv      |
| Bergrheinfeld     | RISE445 | burial 7          | OxA-31879 | 4047     | 27     | -19.2    | 10       | -13.3    |             | 5.9       | 0.7094   | -4.4 Bavaria           | nd  | inf II   |
| Bergrheinfeld     | RISE446 | burial 13 male    | UBA-27950 | 4015     | 38     | -19.5    | 11.2     | -13.7    |             | 5.8       | 0.7088   | -4.4 Bavaria           | M   | Adult    |
| Bergrheinfeld     | RISE447 | burial 8 female   | OxA-31808 | 4025     | 28     | -20.5    | 9.9      | -12.6    |             | 7.9       | 0.7103   | -5.0 Bavaria           | F   | Adult    |
| Bergrheinfeld     | RISE448 | burial 12         | OxA-31809 | 3996     | 28     | -19.4    | 11.5     | -13.6    |             | 5.8       | 0.7087   | -5.4 Bavaria           | F   | Adult    |
| Bergrheinfeld     | RISE449 | burial 8 male     | OxA-31810 | 4015     | 28     | -19.3    | 11.3     | -13.1    |             | 6.2       | 0.7092   | -4.6 Bavaria           | M   | Adult    |
| Bergrheinfeld     | RISE450 | burial 14         | OxA-31811 | 4050     | 28     | -20.1    | 10       | -13.5    |             | 6.6       | 0.7115   | -5.0 Bavaria           | M   | juv      |
| Bergrheinfeld     | RISE451 | burial 18         | P-38111   |          |        |          |          | -13.4    |             |           | 0.7094   | -4.9 Bavaria           | nd  | inf II   |
| Bergrheinfeld     | RISE452 | burial 10         | OxA-31947 | 4080     | 33     | -19.7    | 11.3     | -13.6    |             | 6.2       | 0.7089   | -4.7 Bavaria           | nd  | inf II   |
| Bergrheinfeld     | RISE453 | burial 5          | OxA-31948 | 4016     | 31     | -19.6    | 11       | -13.5    |             | 6.1       | 0.7103   | -5.1 Bavaria           | M   | Adult    |
| Bergrheinfeld     | RISE454 | burial 9          | OxA-31949 | 3994     | 32     | -19.5    | 11.1     | -13.5    |             | 6.0       | 0.7088   | -5.0 Bavaria           | F   | Adult    |
| Bergrheinfeld     | RISE455 | burial 13 female  | OxA-31950 | 4009     | 31     | -19.7    | 11.4     | -13.0    |             | 6.7       | 0.7088   | -4.9 Bavaria           | F   | Adult    |
| Bergrheinfeld     | RISE456 | burial 15         | OxA-31951 | 3971     | 31     | -19.3    | 10.5     | -13.7    |             | 5.6       | 0.7087   | -4.6 Bavaria           | F   | Adult    |
| Bergrheinfeld     | RISE457 | burial 2          | OxA-31952 | 4003     | 32     | -20.1    | 10.6     | -13.5    |             | 6.6       | 0.7106   | -5.0 Bavaria           | F   | Adult    |
| Bergrheinfeld     | RISE458 | burial 4          | OxA-31988 | 3979     | 30     | -19.3    | 9.2      | -13.1    |             | 6.2       | 0.7107   | -4.6 Bavaria           | nd  | juv      |
| Bergrheinfeld     | RISE459 | burial 6          | OxA-31989 | 4064     | 30     | -19.3    | 10.4     | -13.7    |             | 5.6       | 0.7091   | -4.6 Bavaria           | nd  | inf II   |
| Kelheim           | RISE438 | burial 22         | OxA-32091 | 4143     | 29     | -20.6    | 10.2     | -17.1    |             | 3.5       | 0.7169   | -4.1 Bavaria           | F   | Adult    |
| Kelheim           |         | burial 22         | Hv-8535   | 4175     | 70     |          |          |          |             |           |          | Bavaria                | F   | Adult    |
| Lauda-Königshofen | RISE327 | Grave 1           |           |          |        |          |          | -13.1    |             |           | 0.7096   | -5.4 Baden-Württemberg | M?  | Adult    |
| Lauda-Königshofen | RISE328 | Grave 2           |           |          |        |          |          | -12.2    |             |           | 0.7087   | -5.2 Baden-Württemberg | M?  | Adult    |
| Lauda-Königshofen | RISE329 | Grave 3           |           |          |        |          |          | -13.8    |             |           | 0.7106   | -4.0 Baden-Württemberg | M   | Adult    |
| Lauda-Königshofen | RISE330 | Grave 7           |           |          |        |          |          | -14.3    |             |           | 0.7128   | -6.2 Baden-Württemberg | F   | Adult    |
| Lauda-Königshofen | RISE331 | Grave 9/I         | OxA-31175 | 4005     | 32     | -19.6447 | 11.2777  | -13.5    |             | 6.2       | 0.7093   | -5.6 Baden-Württemberg | F   | Adult    |
| Lauda-Königshofen | RISE332 | Grave 12          |           |          |        |          |          | -12.7    |             |           | 0.7093   | -5.0 Baden-Württemberg | M   | Adult    |
| Lauda-Königshofen | RISE333 | Grave 14          | OxA-31062 | 4032     | 30     | -19.7932 | 11.7795  | -10.1    |             | 9.7       | 0.7089   | -4.9 Baden-Württemberg | M   | Adult    |
| Lauda-Königshofen | RISE334 | Grave 18          | P-39960   |          |        |          |          | -14.2    |             |           | 0.7134   | -5.0 Baden-Württemberg | F   | Adult    |
| Lauda-Königshofen | RISE335 | Grave 20/I        | OxA-31063 | 4004     | 29     | -19.7212 | 11.0148  | -13.4    |             | 6.3       | 0.7125   | -5.0 Baden-Württemberg | F   | Adult    |
| Lauda-Königshofen | RISE336 | Grave 21          | OxA-31064 | 3965     | 31     | -19.7317 | 11.1992  | -13.8    |             | 5.9       | 0.7090   | -4.5 Baden-Württemberg | M   | Adult    |
| Lauda-Königshofen | RISE337 | Grave 24          | OxA-31065 | 4023     | 31     | -19.6074 | 11.4933  | -13.7    |             | 5.9       | 0.7088   | -5.6 Baden-Württemberg | M   | Adult    |
| Lauda-Königshofen | RISE338 | Grave 25/II       | OxA-31066 | 4001     | 33     | -19.7436 | 11.5307  | -13.4    |             | 6.4       | 0.7088   | -4.6 Baden-Württemberg | F   | Adult    |
| Lauda-Königshofen | RISE339 | Grave 29/I        |           |          |        |          |          | -13.3    |             |           | 0.7103   | -5.0 Baden-Württemberg | F   | Adult    |
| Lauda-Königshofen | RISE340 | Grave 44          |           |          |        |          |          | -12.8    |             |           | 0.7089   | -5.7 Baden-Württemberg | F   | Adult    |
| Lauda-Königshofen | RISE341 | Grave 47          |           |          |        |          |          |          |             |           |          | Baden-Württemberg      | M   | Mat      |
| Lauda-Königshofen | RISE342 | Grave 49/I        |           |          |        |          |          |          |             |           |          | Baden-Württemberg      | M   | Adult    |
| Lauda-Königshofen | RISE343 | Grave 54          | OxA-31067 | 4013     | 30     | -20.032  | 11.9889  | -9.5     |             | 10.5      | 0.7089   | -5.3 Baden-Württemberg | F   | Adult    |
| Lauda-Königshofen | RISE344 | Grave 55          | P-39968   |          |        |          |          | -12.9    |             |           | 0.7086   | -5.7 Baden-Württemberg | F?  | juv      |
| Lauda-Königshofen |         | Grave 9/I, ind 12 |           |          |        |          |          |          |             |           | 0.7107   | Baden-Württemberg      | F   | Adult    |
| Lauda-Königshofen |         | Grave 12, ind 17  |           |          |        |          |          |          |             |           | 0.7098   | Baden-Württemberg      | M   | Adult    |
| Lauda-Königshofen |         | grave 15, ind 20  |           |          |        |          |          |          |             |           | 0.7088   | Baden-Württemberg      | M   | Adult    |
| Lauda-Königshofen |         | grave 24, ind 30  |           |          |        |          |          |          |             |           | 0.7089   | Baden-Württemberg      | M   | Adult    |
| Lauda-Königshofen |         | grave 28, ind 35  |           |          |        |          |          |          |             |           | 0.7087   | Baden-Württemberg      | F   | Adult    |
| Lauda-Königshofen |         | grave 44, ind 59  |           |          |        |          |          |          |             |           | 0.7092   | Baden-Württemberg      | F   | Adult    |
| Lauda-Königshofen |         | grave 47, ind 62  |           |          |        |          |          |          |             |           | 0.7100   | Baden-Württemberg      | M   | Mat      |
| Lauda-Königshofen |         | grave 57, ind 76  |           |          |        |          |          |          |             |           | 0.7122   | Baden-Württemberg      | M?  | Adult    |
| Lauda-Königshofen |         | Grave 68, ind 89  |           |          |        |          |          |          |             |           | 0.7098   | Baden-Württemberg      | nd  | Adult    |
| Poldering         | RISE439 |                   | OxA-32092 | 4120     | 29     | -21      | 9.8      | -15.3    |             | 5.7       | 0.7108   | -4.8 Bavaria           | nd  | Adult?   |
| Tiefbrunn         | RISE434 | 3/1               | UBA-27946 | 4161     | 34     | -21.4    | 11.3     | -14.6    |             | 6.8       | 0.7105   | -5.9 Bavaria           | M   | Adult    |
| Tiefbrunn         | RISE435 | 3/2               | UBA-27947 | 4094     | 33     | -21.3    | 11.2     | -14.4    |             | 6.9       | 0.7103   | -4.5 Bavaria           | F   | Inf      |
| Tiefbrunn         | RISE436 | 3/3               | UBA-27948 | 4124     | 31     | -21.5    | 10.8     | -14.4    |             | 7.1       | 0.7116   | -5.3 Bavaria           | M   | Adult    |
| Wolkshausen       | RISE440 | burial 9          | UBA-27949 | 3968     | 33     | -19.9    | 11.9     | -14.6    |             | 5.3       | 0.7102   | -4.4 Bavaria           | M   | Adult    |
